# Supplementary material for: Systematic Identification and Characterization of Long Non-Coding RNAs in the Silkworm, Bombyx mori
Source: PubMed Central journal article supplement (PMC4714849; doi:10.1371/journal.pone.0147147), 2016-01-15

**A**

## Gene expression levels in silkworm tissues

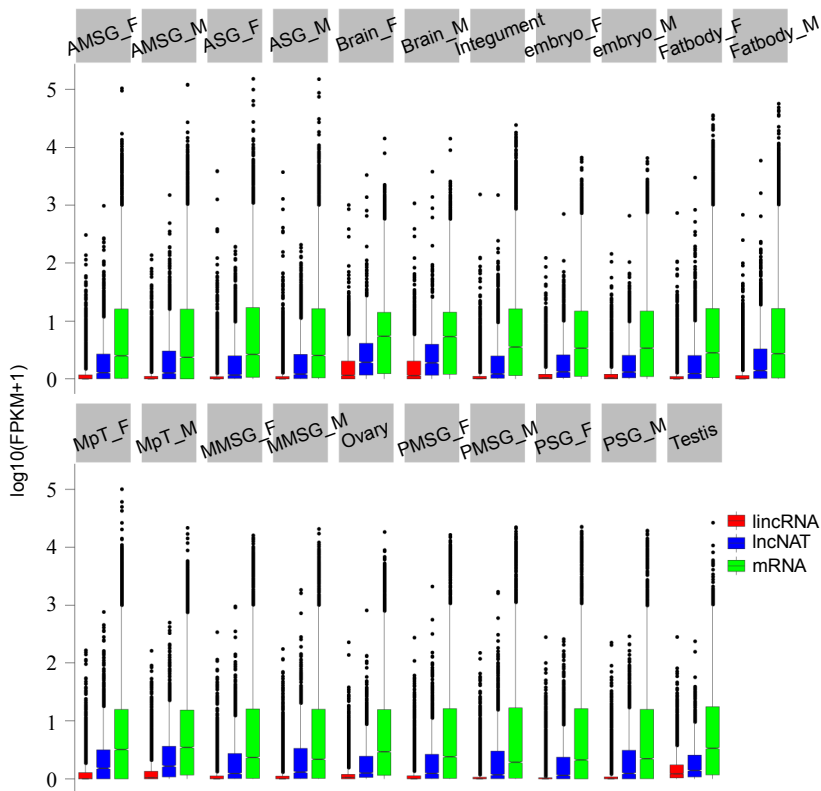**B**

## Distribution of maximal FPKM of lincRNA and mRNAs

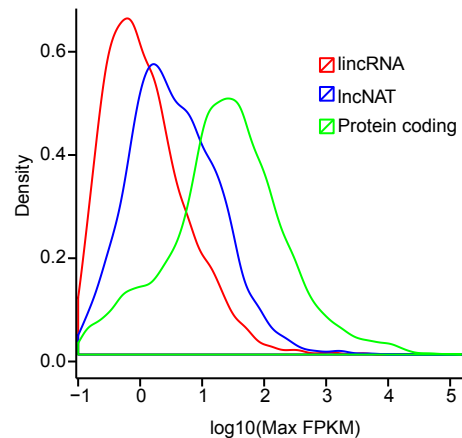

Supplement: pone.0147147.s002.pdf [file pone.0147147.s002.pdf]
