# Supplementary material for: Systematic Identification and Characterization of Long Non-Coding RNAs in the Silkworm, Bombyx mori
Source: PubMed Central journal article supplement (PMC4714849; doi:10.1371/journal.pone.0147147), 2016-01-15

**A**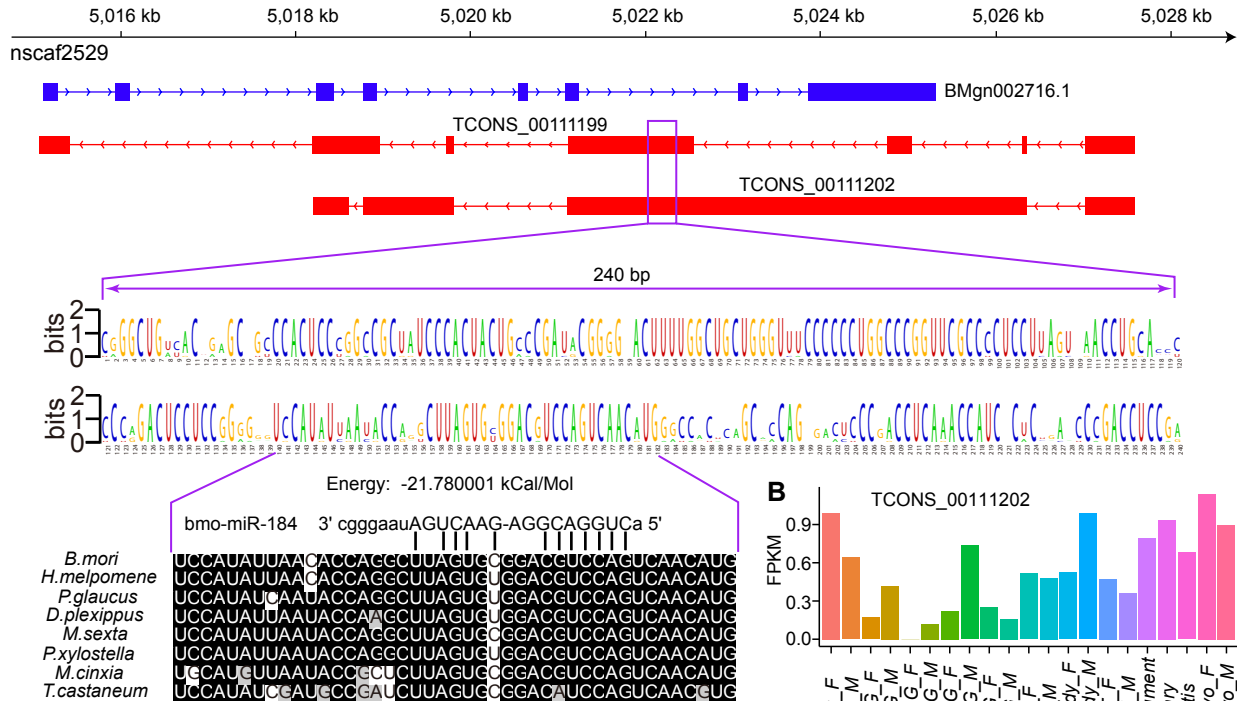**B**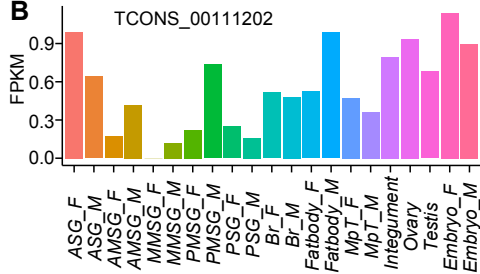

Supplement: pone.0147147.s003.pdf [file pone.0147147.s003.pdf]
